# Supplementary material for: Rab11A Functions as a Negative Regulator of Osteoclastogenesis through Dictating Lysosome-Induced Proteolysis of c-fms and RANK Surface Receptors
Source: MDPI journal article supplement (doi:10.3390/cells9112384), 2020-10-31
Supplement: s1 [file s1]

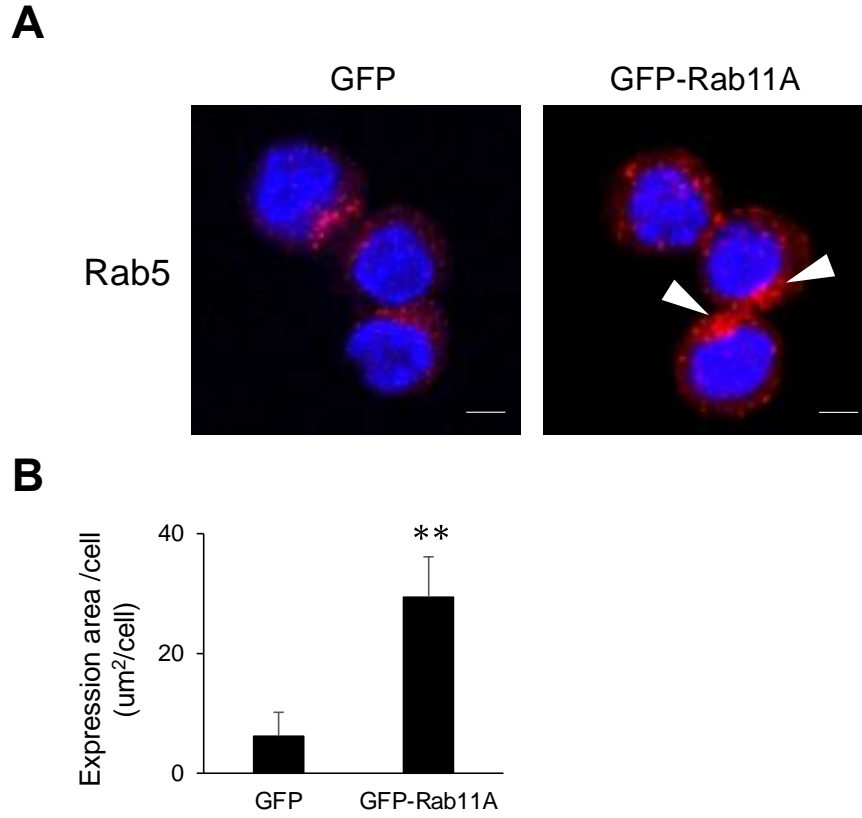

**Figure S1.** Comparison of Rab5 expression between GFP and GFP-Rab11A overexpress RAW-D cells. (A) Representative images of Rab5 expression (red) with the same exposure time. DNA was stained with DAPI (blue). Arrowheads indicated the positive region of Rab5. Scale bars: 5  $\mu\text{m}$ . (B) Expression area divided the number of cells in the field was quantified and measured by ImageJ software. \*\*  $p < 0.01$ . Data are representative of three independent experiments.
